# Supplementary material for: Cytochrome P450s Are Essential for Insecticide Tolerance in the Endoparasitoid Wasp Meteorus pulchricornis (Hymenoptera: Braconidae)
Source: MDPI journal article supplement (doi:10.3390/insects12070651), 2021-07-16
Supplement: s1 [file s1]

Table S1 Primers used for real-time quantitative PCR

| Gene                            | Forward primer          | Reverse primer          | Product Size (bp) |
|---------------------------------|-------------------------|-------------------------|-------------------|
| <i>CYP305d1</i>                 | TCTGGAGTCTTGCAACTGGC    | ATGACTCCGGTGCAATGTGT    | 150               |
| <i>CYP304a1</i>                 | TTTATCCAAACCGTGCCCGT    | GGCGACCGAATCCGAAATTG    | 123               |
| <i>CYP4c4</i>                   | TGACCTTCTCATTGCCGCTT    | GCTCGTGACTGTATGCCCTT    | 162               |
| <i>CYP4c1</i>                   | CCATTCAGTGGTGGTTCACG    | TCCGTCCAAGGACCGAATTG    | 162               |
| <i>CYP6b3</i>                   | GGACCTCGCATTTGCATTGG    | TTCCATTGACGTCGGGTGTT    | 154               |
| <i>CYP302a1</i>                 | CGGTTGCGGTGACACAAAAT    | GGACCGTGACCGAATGGTAA    | 157               |
| <i>CYP9a1</i>                   | TTCGTTGATCCAGTTGCGGA    | GCTTGACGTAAATGCCGGAC    | 108               |
| <i>CYP315a1</i>                 | GAAAGGTCTTGAGGGGGACG    | AGCGGCCAAGATAAGATCCG    | 100               |
| <i><math>\beta</math>-actin</i> | ACCTGAAGAACATCCCGTCCTTT | ACGACCAGAGGCATAAAGGGAAA | 148               |

Table S2 Primers used for RNA interference

| Gene           | <i>dsCYP369B3</i>                               | <i>dsGFP</i>                                    |
|----------------|-------------------------------------------------|-------------------------------------------------|
| <i>Oligo 1</i> | GATCACTAATACGACTCACTATAGGGCCTCACAACACAATTCATTT  | GATCACTAATACGACTCACTATAGGGGGGATGTCTCACATCTTGTTT |
| <i>Oligo 2</i> | AAAATGAATTGTGTTGTGAGGCCCTATAGTGAGTCGTATTAGTGATC | AAACAAGATGTGAGACATCCCCCTATAGTGAGTCGTATTAGTGATC  |
| <i>Oligo 3</i> | AACCTCACAACACAATTCATTCCTATAGTGAGTCGTATTAGTGATC  | AAGGGATGTCTCACATCTTGTCCTATAGTGAGTCGTATTAGTGATC  |
| <i>Oligo 4</i> | GATCACTAATACGACTCACTATAGGGAATGAATTGTGTTGTGAGGTT | GATCACTAATACGACTCACTATAGGGACAAGATGTGAGACATCCCTT |
